# Supplementary material for: Care for MRSA carriers in the outpatient sector: a survey among MRSA carriers and physicians in two regions in Germany
Source: PubMed Central journal article supplement (PMC4845324; doi:10.1186/s12879-016-1503-5), 2016-04-26
Supplement: 12879_2016_1503_MOESM1_ESM.pdf [file 12879_2016_1503_MOESM1_ESM.pdf]

**Additional file 1: Questionnaire for physicians working in the outpatient sector.**

|   |                                                                                                                                                                                                                                                                                                                                                                                                                                                                                                                                                                                                                                                                                                                                                                                                                                                                                                                                                                                                                                                                                                                                                                                                                                                                                                                                                                                                                                                                                                                                                                                                                                                                                                                                                                                                                                                                                                                      |                 |
|---|----------------------------------------------------------------------------------------------------------------------------------------------------------------------------------------------------------------------------------------------------------------------------------------------------------------------------------------------------------------------------------------------------------------------------------------------------------------------------------------------------------------------------------------------------------------------------------------------------------------------------------------------------------------------------------------------------------------------------------------------------------------------------------------------------------------------------------------------------------------------------------------------------------------------------------------------------------------------------------------------------------------------------------------------------------------------------------------------------------------------------------------------------------------------------------------------------------------------------------------------------------------------------------------------------------------------------------------------------------------------------------------------------------------------------------------------------------------------------------------------------------------------------------------------------------------------------------------------------------------------------------------------------------------------------------------------------------------------------------------------------------------------------------------------------------------------------------------------------------------------------------------------------------------------|-----------------|
| 1 | <p><b>How many MRSA positive patients have you seen in your practice in the last 12 months?</b> (If you don't know the exact number, please estimate)</p> <p>_____</p>                                                                                                                                                                                                                                                                                                                                                                                                                                                                                                                                                                                                                                                                                                                                                                                                                                                                                                                                                                                                                                                                                                                                                                                                                                                                                                                                                                                                                                                                                                                                                                                                                                                                                                                                               | Practice        |
| 2 | <p><b>How relevant is MRSA with respect to your patients? Please give your answer on a scale from 0-10. "0" indicating "not relevant at all", "10" indicating "very relevant".</b></p> <p>0    1    2    3    4    5    6    7    8    9    10</p> <p><input type="checkbox"/>   <input type="checkbox"/></p> <p>not all relevant <span style="float: right;">very relevant</span></p>                                                                                                                                                                                                                                                                                                                                                                                                                                                                                                                                                                                                                                                                                                                                                                                                                                                                                                                                                                                                                                                                                                                                                                                                                                                                            | Attitude        |
| 3 | <p><b>Which are your sources of information on MRSA?</b></p> <p><b>Medical journals</b><br/> <input type="checkbox"/>Never   <input type="checkbox"/>Rarely   <input type="checkbox"/>Sometimes   <input type="checkbox"/>Frequently   <input type="checkbox"/>Very frequently</p> <p><b>Recommendations of the National Association of Statutory Health Insurance Physicians ("Kassenärztliche Bundesvereinigung")</b><br/> <input type="checkbox"/>Never   <input type="checkbox"/>Rarely   <input type="checkbox"/>Sometimes   <input type="checkbox"/>Frequently   <input type="checkbox"/>Very frequently</p> <p><b>Recommendations of the Robert Koch Institute (RKI) (the central federal institution responsible for disease control and prevention)</b><br/> <input type="checkbox"/>Never   <input type="checkbox"/>Rarely   <input type="checkbox"/>Sometimes   <input type="checkbox"/>Frequently   <input type="checkbox"/>Very frequently</p> <p><b>Recommendations of the Medical Chamber ("Ärztchammer")</b><br/> <input type="checkbox"/>Never   <input type="checkbox"/>Rarely   <input type="checkbox"/>Sometimes   <input type="checkbox"/>Frequently   <input type="checkbox"/>Very frequently</p> <p><b>Recommendations of a MRSA network</b><br/> <input type="checkbox"/>Never   <input type="checkbox"/>Rarely   <input type="checkbox"/>Sometimes   <input type="checkbox"/>Frequently   <input type="checkbox"/>Very frequently</p> <p><b>Conversation with colleagues</b><br/> <input type="checkbox"/>Never   <input type="checkbox"/>Rarely   <input type="checkbox"/>Sometimes   <input type="checkbox"/>Frequently   <input type="checkbox"/>Very frequently</p> <p><b>Other websites</b><br/> <input type="checkbox"/>Never   <input type="checkbox"/>Rarely   <input type="checkbox"/>Sometimes   <input type="checkbox"/>Frequently   <input type="checkbox"/>Very frequently</p> | Information     |
| 4 | <p><b>Provided you are familiar with the recommendations for MRSA in the outpatient sector of the RKI, the "Kassenärztliche Bundesvereinigung" or a MRSA network - do you agree with these recommendations?</b></p> <p><input type="checkbox"/>Yes   <input type="checkbox"/>In part   <input type="checkbox"/>No   <input type="checkbox"/>I don't know these recommendations<br/> <input type="checkbox"/>Don't know</p>                                                                                                                                                                                                                                                                                                                                                                                                                                                                                                                                                                                                                                                                                                                                                                                                                                                                                                                                                                                                                                                                                                                                                                                                                                                                                                                                                                                                                                                                                           | Recommendations |
| 5 | <p><b>Are you of the opinion that there is enough information available about MRSA in the outpatient sector?</b></p> <p><input type="checkbox"/>Yes   <input type="checkbox"/>No   <input type="checkbox"/>Don't know</p>                                                                                                                                                                                                                                                                                                                                                                                                                                                                                                                                                                                                                                                                                                                                                                                                                                                                                                                                                                                                                                                                                                                                                                                                                                                                                                                                                                                                                                                                                                                                                                                                                                                                                            | Information     |
| 6 | <p><b>Are you a member of a MRSA quality circle or network?</b></p> <p><input type="checkbox"/>Yes   <input type="checkbox"/>No   <input type="checkbox"/>Does not exist in my region</p>                                                                                                                                                                                                                                                                                                                                                                                                                                                                                                                                                                                                                                                                                                                                                                                                                                                                                                                                                                                                                                                                                                                                                                                                                                                                                                                                                                                                                                                                                                                                                                                                                                                                                                                            | Practice        |
| 7 | <p><b>Do you have a "MRSA certificate" from the National Association of Statutory Health Insurance Physicians?</b></p> <p><input type="checkbox"/>Yes   <input type="checkbox"/>No</p>                                                                                                                                                                                                                                                                                                                                                                                                                                                                                                                                                                                                                                                                                                                                                                                                                                                                                                                                                                                                                                                                                                                                                                                                                                                                                                                                                                                                                                                                                                                                                                                                                                                                                                                               | Practice        |
| 8 | <p><b>Do you know the reimbursement possibilities for the screening of patients at risk and the therapy of MRSA carriers?</b></p> <p><input type="checkbox"/>Yes   <input type="checkbox"/>No</p>                                                                                                                                                                                                                                                                                                                                                                                                                                                                                                                                                                                                                                                                                                                                                                                                                                                                                                                                                                                                                                                                                                                                                                                                                                                                                                                                                                                                                                                                                                                                                                                                                                                                                                                    | Knowledge       |
| 9 | <p><b>Which of the following criteria define a patient at risk according to the National Association of Statutory Health Insurance Physicians? (Only two answers are correct)</b></p> <p><input type="checkbox"/>Hospitalization &gt; 4 days in the last 6 months and MRSA positivity in case history</p>                                                                                                                                                                                                                                                                                                                                                                                                                                                                                                                                                                                                                                                                                                                                                                                                                                                                                                                                                                                                                                                                                                                                                                                                                                                                                                                                                                                                                                                                                                                                                                                                            | Knowledge       |

|    |                                                                                                                                                                                                                                                                                                                                                                                                                                                                                                                                                                                                                                                                                |             |
|----|--------------------------------------------------------------------------------------------------------------------------------------------------------------------------------------------------------------------------------------------------------------------------------------------------------------------------------------------------------------------------------------------------------------------------------------------------------------------------------------------------------------------------------------------------------------------------------------------------------------------------------------------------------------------------------|-------------|
|    | <input type="checkbox"/> Hospitalization > 4 days in the last 6 months<br><input type="checkbox"/> Living in a nursing home<br><input type="checkbox"/> Hospitalization > 4 days in the last 6 months and the presence of at least two more risk factors (inserted catheter, need for care, chronic wounds, dialysis dependency, antibiotic therapy in the last 6 months)<br><input type="checkbox"/> Antibiotic therapy in the last 4 weeks<br><input type="checkbox"/> Don't know                                                                                                                                                                                            |             |
| 10 | <b>How many patients have you screened for MRSA in your practice in the last 12 months?</b> (If you don't know the exact number, please estimate)<br><hr/>                                                                                                                                                                                                                                                                                                                                                                                                                                                                                                                     | Practice    |
| 11 | <b>A decolonization therapy has been thoroughly applied. From when on can you define your patient as permanently MRSA negative?</b> (Only one answer is correct)<br><input type="checkbox"/> Negative swab 4 days to 4 weeks after completion of the decolonization therapy.<br><input type="checkbox"/> Negative swab 3 months after completion of the decolonization therapy.<br><input type="checkbox"/> Negative swabs at 2 time points: 3 to 6 months and 11 to 13 months after completion of the decolonization therapy.<br><input type="checkbox"/> Negative swabs at 2 time points: 6 to 12 months and 22 to 24 months after completion of the decolonization therapy. | Practice    |
| 12 | <b>How useful do you think is the application of a decolonization therapy in the outpatient sector in general?</b><br><input type="checkbox"/> Always useful <input type="checkbox"/> Often useful <input type="checkbox"/> Sometimes useful <input type="checkbox"/> Never useful                                                                                                                                                                                                                                                                                                                                                                                             | Attitude    |
| 13 | <b>How many MRSA positive patients have you already treated with a decolonization therapy?</b><br>(If you don't know the exact number, please estimate)<br><hr/>                                                                                                                                                                                                                                                                                                                                                                                                                                                                                                               | Practice    |
| 14 | <b>If you have already used decolonization therapies: How often do you estimate the decolonization therapy to have been successful?</b><br><input type="checkbox"/> Up to 0% <input type="checkbox"/> Up to 33% <input type="checkbox"/> Up to 66% <input type="checkbox"/> Almost 100% <input type="checkbox"/> Don't know                                                                                                                                                                                                                                                                                                                                                    | Practice    |
| 15 | <b>Are there, in your opinion, any difficulties concerning decolonization therapy in the outpatient sector?</b><br>(Multiple answers possible)<br><input type="checkbox"/> None<br><input type="checkbox"/> Patients cannot procure the financial contribution necessary.<br><input type="checkbox"/> Patients and family fail at the practical implementation.<br><input type="checkbox"/> Staff at the nursing home fails at the practical implementation.<br><input type="checkbox"/> Other: _____<br><hr/>                                                                                                                                                                 | Practice    |
| 16 | <b>How often do you estimate does the hospital actually report a positive MRSA finding to you?</b><br><b>In the discharge letter</b><br><input type="checkbox"/> Never <input type="checkbox"/> Rarely <input type="checkbox"/> Sometimes <input type="checkbox"/> Frequently <input type="checkbox"/> Very frequently<br><b>Additionally by phone</b><br><input type="checkbox"/> Never <input type="checkbox"/> Rarely <input type="checkbox"/> Sometimes <input type="checkbox"/> Frequently <input type="checkbox"/> Very frequently                                                                                                                                       | Information |
| 17 | <b>How often do you estimate to become informed about a decolonization therapy that was started at the hospital?</b><br><input type="checkbox"/> Never <input type="checkbox"/> Rarely <input type="checkbox"/> Sometimes <input type="checkbox"/> Frequently <input type="checkbox"/> Very frequently                                                                                                                                                                                                                                                                                                                                                                         | Information |
| 18 | <b>Do you have specific requests concerning the communication between the inpatient and outpatient sector with regard to MRSA?</b><br><hr/>                                                                                                                                                                                                                                                                                                                                                                                                                                                                                                                                    | Information |

|    |                                                                                                                                                                                                                                                                                                                                                                                                                                                                                                                                                                                                                                                                                                                                                                                                               |               |
|----|---------------------------------------------------------------------------------------------------------------------------------------------------------------------------------------------------------------------------------------------------------------------------------------------------------------------------------------------------------------------------------------------------------------------------------------------------------------------------------------------------------------------------------------------------------------------------------------------------------------------------------------------------------------------------------------------------------------------------------------------------------------------------------------------------------------|---------------|
| 19 | <p><b>Reimbursement for MRSA specific therapy was introduced on 31.03.2012; it allows reimbursement for:</b><br/>(multiple answers are possible)</p> <ul style="list-style-type: none"> <li><input type="checkbox"/>Determination of MRSA status for all patients &gt; 60 years</li> <li><input type="checkbox"/>Therapy and care for a patient at risk who is MRSA positive or for a MRSA positive contact person</li> <li><input type="checkbox"/>MRSA status of a patient at risk</li> <li><input type="checkbox"/>Participation in a MRSA case conference or a regional MRSA network conference</li> <li><input type="checkbox"/>Remuneration of services is fixed, without upper limit and outside the patient's overall remuneration. ("außerhalb der morbiditätsbedingten Gesamtvergütung")</li> </ul> | Knowledge     |
| 20 | <p><b>I am entitled to the reimbursement of the above mentioned items.</b></p> <ul style="list-style-type: none"> <li><input type="checkbox"/>Yes</li> <li><input type="checkbox"/>No</li> <li><input type="checkbox"/>Don't know</li> </ul>                                                                                                                                                                                                                                                                                                                                                                                                                                                                                                                                                                  | Reimbursement |
| 21 | <p><b>Costs for screening of patients at risk and their subsequent treatment can be claimed.</b><br/><b>How satisfied are you with the amount of the reimbursement of the Statutory Health Insurance for the above mentioned items?</b></p> <ul style="list-style-type: none"> <li><input type="checkbox"/>Very satisfied</li> <li><input type="checkbox"/>Satisfied</li> <li><input type="checkbox"/>Unsatisfied</li> <li><input type="checkbox"/>Don't know</li> </ul>                                                                                                                                                                                                                                                                                                                                      | Reimbursement |
| 22 | <p><b>Which adjustments do you recommend for reimbursement?</b></p> <p>_____</p>                                                                                                                                                                                                                                                                                                                                                                                                                                                                                                                                                                                                                                                                                                                              | Reimbursement |
| 23 | <p><b>You are a physician working in the outpatient sector. Which is your specialization?</b></p> <ul style="list-style-type: none"> <li><input type="checkbox"/>General practitioner (GP)</li> <li><input type="checkbox"/>Internal medicine (working as GP)</li> <li><input type="checkbox"/>Internal medicine</li> <li><input type="checkbox"/>Dermatology</li> <li><input type="checkbox"/>Urologist</li> <li><input type="checkbox"/>Other</li> </ul>                                                                                                                                                                                                                                                                                                                                                    | Demography    |
| 24 | <p><b>Your gender is:</b></p> <ul style="list-style-type: none"> <li><input type="checkbox"/>male <input type="checkbox"/>female</li> </ul>                                                                                                                                                                                                                                                                                                                                                                                                                                                                                                                                                                                                                                                                   | Demography    |
| 25 | <p><b>Your age in years?</b></p> <p>_____</p>                                                                                                                                                                                                                                                                                                                                                                                                                                                                                                                                                                                                                                                                                                                                                                 | Demography    |
| 26 | <p><b>For how many years have you been working as a physician in the outpatient sector?</b></p> <p>_____</p>                                                                                                                                                                                                                                                                                                                                                                                                                                                                                                                                                                                                                                                                                                  | Demography    |
