# Supplementary material for: Care for MRSA carriers in the outpatient sector: a survey among MRSA carriers and physicians in two regions in Germany
Source: PubMed Central journal article supplement (PMC4845324; doi:10.1186/s12879-016-1503-5), 2016-04-26

**Additional Figure 1: Recruitment of MRSA carriers**

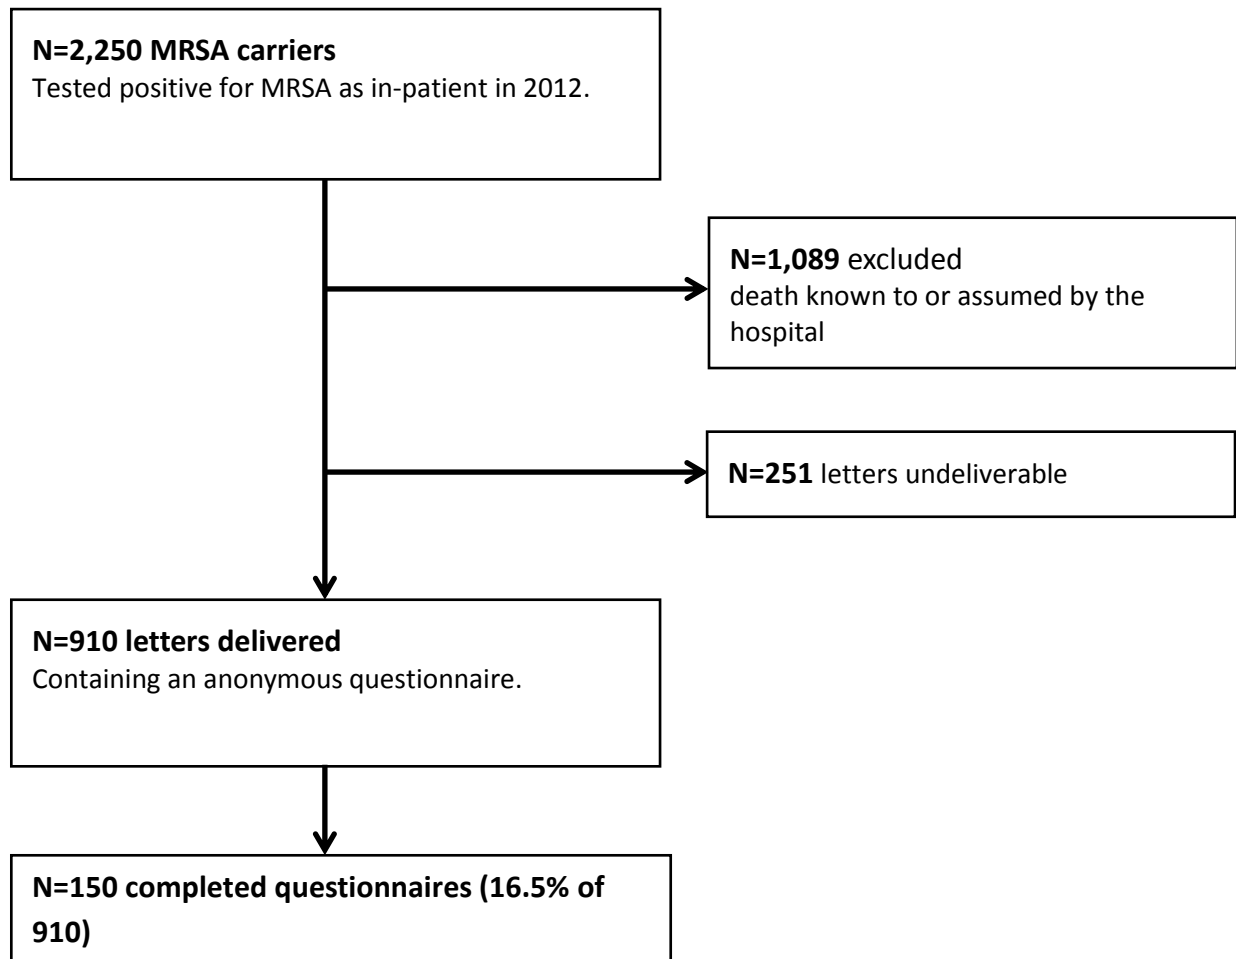

Supplement: 12879_2016_1503_MOESM3_ESM.pdf [file 12879_2016_1503_MOESM3_ESM.pdf]
