# Supplementary material for: Care for MRSA carriers in the outpatient sector: a survey among MRSA carriers and physicians in two regions in Germany
Source: Springer Nature journal article supplement (doi:10.1186/s12879-016-1503-5), 2016-04-26
Supplement: MOESM2 [file 10049646]

|    |                                                                                                                                                                                                                                                                                                                                                                                                                                                                            |                 |
|----|----------------------------------------------------------------------------------------------------------------------------------------------------------------------------------------------------------------------------------------------------------------------------------------------------------------------------------------------------------------------------------------------------------------------------------------------------------------------------|-----------------|
|    | <input type="checkbox"/> Correct <input type="checkbox"/> Not correct <input type="checkbox"/> Don't know                                                                                                                                                                                                                                                                                                                                                                  |                 |
| 11 | <b>Contact to healthy individuals in the private setting is no problem. This is also true for skin contact, i.e. handshaking or hugging.</b><br><input type="checkbox"/> Correct <input type="checkbox"/> Not correct <input type="checkbox"/> Don't know                                                                                                                                                                                                                  | Knowledge       |
| 12 | <b>When dealing with infected wounds, special care should be applied (i.e. the use of gloves and hand disinfections)</b><br><input type="checkbox"/> Correct <input type="checkbox"/> Not correct <input type="checkbox"/> Don't know                                                                                                                                                                                                                                      | Knowledge       |
| 13 | <b>If MRSA was diagnosed, which of the following home hygiene measures is recommended? (only one correct answer)</b><br><input type="checkbox"/> Laundry should be washed at $\geq 90^{\circ}\text{C}$ .<br><input type="checkbox"/> Laundry washed at $60^{\circ}\text{C}$ and the use of all-purpose detergent ("Vollwaschmittel") is sufficient.<br><input type="checkbox"/> Laundry washed at $30^{\circ}\text{C}$ and the use of all-purpose detergent is sufficient. | Knowledge       |
| 14 | <b>How would you describe your current state of health?</b><br><input type="checkbox"/> Excellent <input type="checkbox"/> Very good <input type="checkbox"/> Good <input type="checkbox"/> Not so good <input type="checkbox"/> Bad                                                                                                                                                                                                                                       | State of health |
| 15 | <b>How satisfied are you with your current quality of life in general?</b><br><input type="checkbox"/> Very satisfied <input type="checkbox"/> Satisfied <input type="checkbox"/> Rather satisfied <input type="checkbox"/> Rather unsatisfied<br><input type="checkbox"/> Unsatisfied                                                                                                                                                                                     | Life quality    |
| 16 | <b>Has your quality of life change because of MRSA?</b><br><input type="checkbox"/> Improved <input type="checkbox"/> Rather improved <input type="checkbox"/> Unchanged <input type="checkbox"/> Rather worsened<br><input type="checkbox"/> Worsened                                                                                                                                                                                                                     | Life quality    |
| 17 | <b>Do you attach importance to the MRSA finding?</b><br><input type="checkbox"/> Yes, a lot <input type="checkbox"/> Yes, some <input type="checkbox"/> Intermediate <input type="checkbox"/> Rather not <input type="checkbox"/> No                                                                                                                                                                                                                                       | Attitude        |
| 18 | <b>Does the MRSA finding make you afraid?</b><br><input type="checkbox"/> Yes, a lot <input type="checkbox"/> Yes, some <input type="checkbox"/> Intermediate <input type="checkbox"/> Rather not <input type="checkbox"/> No                                                                                                                                                                                                                                              | Attitude        |
| 19 | <b>Does MRSA influence your daily life at home (not at the hospital)? I have given up activities because of MRSA (i.e. swimming or other sport, sauna)</b><br><input type="checkbox"/> Does apply <input type="checkbox"/> Does not apply                                                                                                                                                                                                                                  | Stigmatization  |
|    | <b>I was rejected by an ambulance service because of MRSA.</b><br><input type="checkbox"/> Does apply <input type="checkbox"/> Does not apply                                                                                                                                                                                                                                                                                                                              | Stigmatization  |
|    | <b>I was rejected by a dentist or resident physician because of MRSA.</b><br><input type="checkbox"/> Does apply <input type="checkbox"/> Does not apply                                                                                                                                                                                                                                                                                                                   | Stigmatization  |
|    | <b>I was rejected by a nursing home because of MRSA.</b><br><input type="checkbox"/> Does apply <input type="checkbox"/> Does not apply                                                                                                                                                                                                                                                                                                                                    | Stigmatization  |
|    | <b>I was rejected by a rehabilitation clinic because of MRSA.</b><br><input type="checkbox"/> Does apply <input type="checkbox"/> Does not apply                                                                                                                                                                                                                                                                                                                           | Stigmatization  |
|    | <b>I avoid other people due to MRSA because I don't want to transmit the germ [i.e. grandchildren].</b><br><input type="checkbox"/> Does apply <input type="checkbox"/> Does not apply                                                                                                                                                                                                                                                                                     | Stigmatization  |
|    | <b>I feel avoided by others (e.g. neighbours) because of MRSA.</b><br><input type="checkbox"/> Does apply <input type="checkbox"/> Does not apply                                                                                                                                                                                                                                                                                                                          | Stigmatization  |
| 20 | <b>Which of the following procedures was applied to you during the decolonization therapy?</b><br><b>Therapy with nasal ointment</b><br><input type="checkbox"/> Yes <input type="checkbox"/> No <input type="checkbox"/> Don't know                                                                                                                                                                                                                                       | Practice        |
|    | <b>Skin and Hair washing with disinfectants</b><br><input type="checkbox"/> Yes <input type="checkbox"/> No <input type="checkbox"/> Don't know                                                                                                                                                                                                                                                                                                                            | Practice        |
|    | <b>Mouthwashes</b><br><input type="checkbox"/> Yes <input type="checkbox"/> No <input type="checkbox"/> Don't know                                                                                                                                                                                                                                                                                                                                                         | Practice        |
|    | <b>Daily change of bedding and towels</b><br><input type="checkbox"/> Yes <input type="checkbox"/> No <input type="checkbox"/> Don't know                                                                                                                                                                                                                                                                                                                                  | Practice        |

|    |                                                                                                                                                                                                                                                                                                                                                                                                              |                 |
|----|--------------------------------------------------------------------------------------------------------------------------------------------------------------------------------------------------------------------------------------------------------------------------------------------------------------------------------------------------------------------------------------------------------------|-----------------|
|    | <b>Daily change of clothing</b><br><input type="checkbox"/> Yes <input type="checkbox"/> No <input type="checkbox"/> Don't know                                                                                                                                                                                                                                                                              | Practice        |
|    | <b>Daily change of hygiene utensils like toothbrush, razor, comb etc.</b><br><input type="checkbox"/> Yes <input type="checkbox"/> No <input type="checkbox"/> Don't know                                                                                                                                                                                                                                    | Practice        |
| 21 | <b>Has the application of this special therapy to remove MRSA been proposed to you?</b><br>In the hospital <input type="checkbox"/> Yes <input type="checkbox"/> No <input type="checkbox"/> Don't know<br>By a physician after discharge from hospital <input type="checkbox"/> Yes <input type="checkbox"/> No <input type="checkbox"/> Don't know                                                         | Practice        |
| 22 | <b>Has this special therapy been applied to you?</b><br><input type="checkbox"/> Yes <input type="checkbox"/> No Why not? _____                                                                                                                                                                                                                                                                              | Practice        |
|    | <b>If yes, where?</b><br>In the Hospital <input type="checkbox"/> Yes <input type="checkbox"/> No <input type="checkbox"/> Don't know<br>At home <input type="checkbox"/> Yes <input type="checkbox"/> No <input type="checkbox"/> Don't know<br>Started in the hospital and terminated at home <input type="checkbox"/> Yes <input type="checkbox"/> No <input type="checkbox"/> Don't know                 | Practice        |
| 23 | <b>This special therapy usually takes 5 days.</b><br><b>Has this therapy been applied to you more than once?</b><br><input type="checkbox"/> Yes ----times<br><input type="checkbox"/> No<br><input type="checkbox"/> Don't know                                                                                                                                                                             | Practice        |
| 24 | <b>Has this special therapy been successful?</b><br><input type="checkbox"/> Yes <input type="checkbox"/> No <input type="checkbox"/> Don't know                                                                                                                                                                                                                                                             | Practice        |
| 25 | <b>Do you remember the result of the last swab?</b><br>Was it:<br><input type="checkbox"/> Positive for MRSA <input type="checkbox"/> Negative for MRSA <input type="checkbox"/> Don't know                                                                                                                                                                                                                  | Medical History |
| 26 | <b>Did you encounter any problems during this therapy? Which ones?</b><br>_____                                                                                                                                                                                                                                                                                                                              | Practice        |
| 27 | <b>Patients have to bear a proportion of the costs by themselves, i.e. for the special shampoo and washing lotion. Which answer would apply to you?</b><br><input type="checkbox"/> The additional costs are a problem for me.<br><input type="checkbox"/> The additional costs are no problem for me.<br><input type="checkbox"/> Don't know.                                                               | Practice        |
| 28 | <b>Would you like to tell us something else which we forgot?</b><br>_____                                                                                                                                                                                                                                                                                                                                    |                 |
| 29 | <b>Your gender is:</b><br><input type="checkbox"/> Male <input type="checkbox"/> Female                                                                                                                                                                                                                                                                                                                      | Demography      |
| 30 | <b>How old are you in years?</b><br>_____ years                                                                                                                                                                                                                                                                                                                                                              | Demography      |
| 31 | <b>Do you live in a nursing home?</b><br><input type="checkbox"/> Yes <input type="checkbox"/> No                                                                                                                                                                                                                                                                                                            | Demography      |
| 32 | <b>Do you have a constant need for nursing care ("Pflegestufe")</b><br><input type="checkbox"/> Yes <input type="checkbox"/> No                                                                                                                                                                                                                                                                              | Demography      |
| 33 | <b>Does one or more of the following risk factors apply to you?</b><br>(Multiple answers are possible)<br><input type="checkbox"/> Urinary catheter<br><input type="checkbox"/> Dialysis<br><input type="checkbox"/> Chronic open wounds<br><input type="checkbox"/> A chronic skin disease, e.g. psoriasis<br><input type="checkbox"/> Occupational exposure to livestock, e.g. as a farmer or veterinarian | Medical history |
| 34 | <b>Which is your highest school leaving qualification?</b><br>Primary education<br>Lower secondary general education, without direct access to upper secondary education ("Hauptschule")                                                                                                                                                                                                                     | Demography      |

|     |                                                                                                                                                                                                                                                                                                                                                                                                                                                                                                                                                                                                             |            |
|-----|-------------------------------------------------------------------------------------------------------------------------------------------------------------------------------------------------------------------------------------------------------------------------------------------------------------------------------------------------------------------------------------------------------------------------------------------------------------------------------------------------------------------------------------------------------------------------------------------------------------|------------|
|     | <p>Lower secondary general education, with direct access to upper secondary education (“Realschule”)</p> <p>Lower secondary general education, with direct access to upper secondary education (“Polytechnische Oberschule” in the German Democratic Republic)</p> <p>Upper secondary general education, with direct access to universities of applied sciences (“Fachhochschulreife”)</p> <p>Upper secondary general education, with direct access to universities (“allgemeine Hochschulreife”)</p> <p>Other school leaving qualification:<br/>Still in school, aspired school leaving qualification:</p> |            |
| 35  | <p><b>In which country were you born?</b></p> <p><input type="checkbox"/> In Germany (within the current national borders)</p> <p><input type="checkbox"/> In Germany (within the borders before 1945)</p> <p><input type="checkbox"/> In another country</p>                                                                                                                                                                                                                                                                                                                                               | Demography |
| 36  | <p><b>Is German your mother tongue?</b></p> <p><input type="checkbox"/> Yes      <input type="checkbox"/> No</p>                                                                                                                                                                                                                                                                                                                                                                                                                                                                                            | Demography |
| 36a | <p><b>If German is not your mother tongue, how good is your command of the German language?</b></p> <p><input type="checkbox"/> very good   <input type="checkbox"/> good   <input type="checkbox"/> moderate   <input type="checkbox"/> little   <input type="checkbox"/> none</p>                                                                                                                                                                                                                                                                                                                         | Demography |
| 37  | <p><b>Did you need help to complete the questionnaire?</b></p> <p><input type="checkbox"/> Yes      <input type="checkbox"/> No</p>                                                                                                                                                                                                                                                                                                                                                                                                                                                                         | Demography |
